# Supplementary material for: Construction of Ag-doped Zn–In–S quantum dots toward white LEDs and 3D luminescent patterning
Source: Royal Society of Chemistry journal article supplement (doi:10.1039/c6ra05689j), 2016-01-01
Supplement: c6ra05689j1.pdf [file c6ra05689j1.pdf]

## Supporting Information

### Construction of Ag-doped Zn-In-S quantum dots toward white LEDs and 3D luminescent patterning

Qiu-Hong Zhang, Yu Tian, Cai-Feng Wang, and Su Chen\*

Table S1. Properties of Cd-free QD-based White DC-LEDs in Previously Reported Works and present work

| color-converting materials                                                     | LE (lm/W) | applied<br>current<br>(mA) | $T_c$ (K) | CRI  | ref             |
|--------------------------------------------------------------------------------|-----------|----------------------------|-----------|------|-----------------|
| yellow $\text{AgIn}_5\text{S}_8$ -ZnS NCs                                      | 53        | 60                         | 3700      | 74   | 44              |
| yellow YAG:Ce<br>nanoparticles + red CIS/ZnS<br>QDs                            | 21.1      | 1200                       | 3934      | 84.6 | 35              |
| green $\text{Ba}_2\text{SiO}_4\text{:Eu}^{2+}$ + orange<br>and red CIS/ZnS QDs | 32.7      | 20                         | 6552      | 90   | 18              |
| green InP/ZnS + broad-band<br>orange CIS/ZnS QDs                               | 45.5      | 20                         | 3803      | 90   | 39              |
| yellow YAG:Ce + green and<br>red $\text{CuInS}_2$ QDs                          | 45.0      | 20                         | 4764      | 93.1 | 36              |
| yellow YAG:Ce + green and<br>red $\text{CuInS}_2$ QDs                          | 60.3      | 350                        | 3649      | 81.6 | 36              |
| green and red $\text{CuInS}_2$ NCs                                             | 67.8      | 20                         | 4694      | 95.3 | 37              |
| green Zn-Ag-In-S and red<br>Zn-Cu-In-S QDs                                     | 31.2      | 20                         | 3500      | 97   | 47              |
| green Ag:Zn-In-S/ZnS d-<br>QDs, YAG-05 and R635<br>phosphor                    | 43.7      | 350                        | 5031      | 90.3 | Present<br>work |
| YAG-05 and R635 phosphor                                                       | 31.3      | 350                        | 3677      | 83.2 |                 |

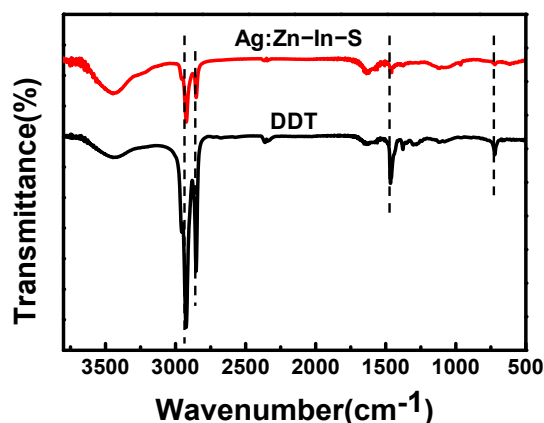

Fig S1. FT-IR spectra of Ag:Zn-In-S d-QDs and DDT.

### The quantum yield calculation

The quantum yield measurements were performed with quinine sulfate in 0.10 M H<sub>2</sub>SO<sub>4</sub> solution (literature quantum yield 0.54 at 360 nm) as the standard. The relative quantum yield values were calculated corresponding to the following equation:

$$Q = Q_s \frac{I A_s n_s^2}{I_s A n^2}$$

Q is relative quantum yield; I is the measured integrated fluorescence emission intensity; A is the optical density measured at the excitation wavelength; n is the refractive index of corresponding solvents. The subscript “s” refers to the standard. Letters without subscript refer to the unknown quantum yield of as-prepared d-QDs. The refractive indexes of 0.10 M H<sub>2</sub>SO<sub>4</sub> solution and toluene were 1.333 and 1.497, respectively (0.10 M H<sub>2</sub>SO<sub>4</sub> solution was assumed as water). In order to minimize re-absorption effects, absorbance were kept under 0.05.

Table S2. Quantum yield measurements of Ag:Zn-In-S and Ag:Zn-In-S/ZnS d-QDs.

| quinine sulfate | Q <sub>s</sub> | I <sub>s</sub> | A <sub>s</sub> | n <sub>s</sub> |
|-----------------|----------------|----------------|----------------|----------------|
|                 | 0.54           | 10986          | 0.0352         | 1.333          |
| Ag:Zn-In-S      | Q              | I              | A              | n              |
|                 | 7%             | 1332.7         | 0.0308         | 1.497          |
| Ag:Zn-In-S/ZnS  | Q              | I              | A              | n              |
|                 | 28%            | 4106.9         | 0.0313         | 1.497          |
